# Supplementary material for: Improvement of thermal stability and photoluminescence in Sr0.8Ca0.2Al2Si2O8:Eu2+ by the substitution of Si–Na # Al–Sr and Ca # Sr for structural modifications
Source: Royal Society of Chemistry journal article supplement (doi:10.1039/c7dt02916k), 2017-01-01
Supplement: c7dt02916k1.pdf [file c7dt02916k1.pdf]

**Improvement of thermally stable and photoluminescence in  $\text{Sr}_{0.8}\text{Ca}_{0.2}\text{Al}_2\text{Si}_2\text{O}_8:\text{Eu}^{2+}$  by the  
substitution of Si-Na # Al-Sr and Ca # Sr on structural modifications**

Zhenling Li, Zhijun Wang\*, Panlai Li\*, Jingcheng, Miaomiao Tian, Chao Wang, Zhiping Yang

Hebei Key Lab of Optic-Electronic Information and Materials, Hebei University, Baoding 071002, China

Table S1 Atomic coordination of  $\text{Sr}_{0.8}\text{Ca}_{0.2}\text{Al}_2\text{Si}_2\text{O}_8$ 

| Atom | Position | x      | y       | z      | Occupancy |
|------|----------|--------|---------|--------|-----------|
| Ca1  | 24i      | 0.2713 | -0.0002 | 0.0665 | 0.2       |
| Sr1  | 24i      | 0.2713 | -0.0002 | 0.0665 | 0.8       |
| Ca2  | 24i      | 0.2702 | 0.0041  | 0.5650 | 0.2       |
| Sr2  | 24i      | 0.2702 | 0.0041  | 0.5650 | 0.8       |
| Si1  | 24i      | 0.0074 | 0.1725  | 0.1079 | 0.88      |
| Al1  | 24i      | 0.0074 | 0.1725  | 0.1079 | 0.12      |
| Si2  | 24i      | 0.0027 | 0.1762  | 0.6158 | 0.12      |
| Al2  | 24i      | 0.0027 | 0.1762  | 0.6158 | 0.88      |
| Si3  | 24i      | 0.0024 | 0.8205  | 0.1168 | 0.12      |
| Al3  | 24i      | 0.0024 | 0.8205  | 0.1168 | 0.88      |
| Si4  | 24i      | 0.0073 | 0.8234  | 0.6090 | 0.88      |
| Al4  | 24i      | 0.0073 | 0.8234  | 0.6090 | 0.12      |
| Si5  | 24i      | 0.6945 | 0.1197  | 0.1691 | 0.12      |
| Al5  | 24i      | 0.6945 | 0.1197  | 0.1691 | 0.88      |
| Si6  | 24i      | 0.6846 | 0.1123  | 0.6700 | 0.88      |
| Al6  | 24i      | 0.6846 | 0.1123  | 0.6700 | 0.12      |
| Si7  | 24i      | 0.6862 | 0.8860  | 0.1740 | 0.88      |
| Al7  | 24i      | 0.6862 | 0.8860  | 0.1740 | 0.12      |
| Si8  | 24i      | 0.6942 | 0.8786  | 0.6717 | 0.12      |
| Al8  | 24i      | 0.6942 | 0.8786  | 0.6717 | 0.88      |

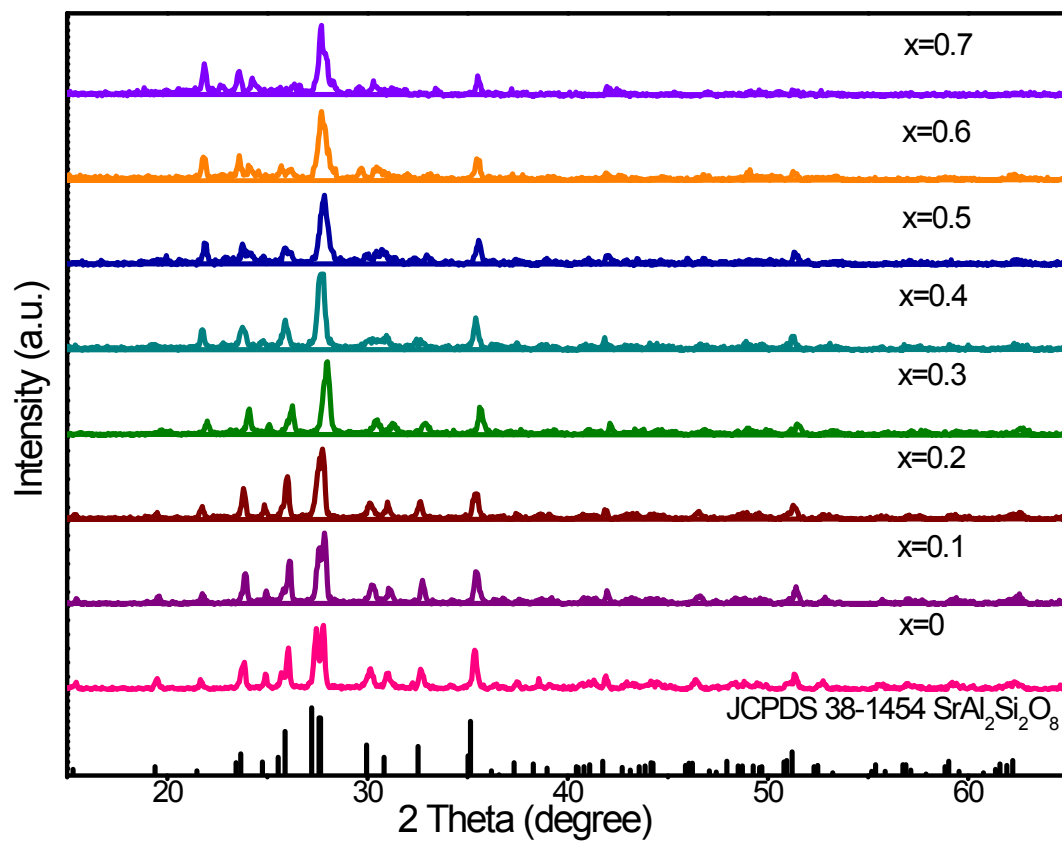

Fig.S1 XRD patterns of  $\text{Sr}_{0.77-x}\text{Na}_x\text{Ca}_{0.2}\text{Al}_{2-x}\text{Si}_{2+x}\text{O}_8:0.03\text{Eu}^{2+}$  ( $x=0, 0.1, 0.2, 0.3, 0.4, 0.5, 0.6$  and  $0.7$ ).

TableS2 Atomic fraction, coordinates and isotropic displacement parameters for  $\text{Sr}_{0.77-x}\text{Na}_x\text{Ca}_{0.2}\text{Al}_{2-x}\text{Si}_{2+x}\text{O}_8:0.03\text{Eu}^{2+}$  series. (x=0, 0.2, 0.4, 0.6)

| x   | Atom | Fraction | x      | y       | z      | Uiso    |
|-----|------|----------|--------|---------|--------|---------|
| 0   | Ca1  | 0.2412   | 0.2713 | -0.0002 | 0.0665 | 0.1337  |
|     | Sr1  | 0.7299   | 0.2713 | -0.0002 | 0.0665 | 0.1337  |
|     | Eu1  | 0.0289   | 0.2713 | -0.0002 | 0.0665 | 0.09    |
|     | Ca2  | 0.1588   | 0.2702 | 0.0041  | 0.5650 | 0.0032  |
|     | Sr2  | 0.8101   | 0.2702 | 0.0041  | 0.5650 | 0.06652 |
|     | Eu2  | 0.0311   | 0.2702 | 0.0041  | 0.5650 | 0.025   |
| 0.2 | Ca1  | 0.2364   | 0.2713 | -0.0002 | 0.0665 | 0.00946 |
|     | Sr1  | 0.7345   | 0.2713 | -0.0002 | 0.0665 | 0.00946 |
|     | Eu1  | 0.0291   | 0.2713 | -0.0002 | 0.0665 | 0.025   |
|     | Ca2  | 0.1741   | 0.2702 | 0.0041  | 0.5650 | 0.00426 |
|     | Sr2  | 0.795    | 0.2702 | 0.0041  | 0.5650 | 0.00426 |
|     | Eu2  | 0.0309   | 0.2702 | 0.0041  | 0.5650 | 0.025   |
| 0.4 | Ca1  | 0.2257   | 0.2713 | -0.0002 | 0.0665 | 0.03062 |
|     | Sr1  | 0.7446   | 0.2713 | -0.0002 | 0.0665 | 0.03062 |
|     | Eu1  | 0.0297   | 0.2713 | -0.0002 | 0.0665 | 0.025   |
|     | Ca2  | 0.1703   | 0.2702 | 0.0041  | 0.5650 | 0.042   |
|     | Sr2  | 0.7994   | 0.2702 | 0.0041  | 0.5650 | 0.042   |
|     | Eu2  | 0.0303   | 0.2702 | 0.0041  | 0.5650 | 0.025   |
| 0.6 | Ca1  | 0.2135   | 0.2713 | -0.0002 | 0.0665 | 0.0032  |
|     | Sr1  | 0.7651   | 0.2713 | -0.0002 | 0.0665 | 0.01753 |
|     | Eu1  | 0.0214   | 0.2713 | -0.0002 | 0.0665 | 0.01753 |
|     | Ca2  | 0.1692   | 0.2702 | 0.0041  | 0.5650 | 0.0032  |
|     | Sr2  | 0.7922   | 0.2702 | 0.0041  | 0.5650 | 0.14579 |
|     | Eu2  | 0.0386   | 0.2702 | 0.0041  | 0.5650 | 0.17048 |

Table S3 Bond length (Å) of  $\text{Sr}_{0.77-x}\text{Na}_x\text{Ca}_{0.2}\text{Al}_{2-x}\text{Si}_{2+x}\text{O}_8:0.03\text{Eu}^{2+}$  (x=0, 0.2, 0.4, 0.6)

| (EuO)6           | x=0    | x=0.2  | x=0.4  | x=0.6  |
|------------------|--------|--------|--------|--------|
| Eu-O3            | 2.428  | 2.406  | 2.397  | 2.383  |
| Eu-O15           | 2.801  | 2.802  | 2.803  | 2.829  |
| Eu-O13           | 2.732  | 2.724  | 2.723  | 2.712  |
| Eu-O1            | 2.678  | 2.658  | 2.652  | 2.624  |
| Eu-O1            | 2.627  | 2.611  | 2.608  | 2.619  |
| Eu-O5            | 2.725  | 2.717  | 2.712  | 2.679  |
| $d_{\text{ave}}$ | 2.665  | 2.653  | 2.65   | 2.641  |
| D                | 0.0344 | 0.0363 | 0.0372 | 0.0375 |
| (EuO)7           | x=0    | x=0.2  | x=0.4  | x=0.6  |
| O8               | 2.781  | 2.773  | 2.782  | 2.824  |
| O6               | 2.828  | 2.82   | 2.816  | 2.78   |
| O2               | 2.651  | 2.635  | 2.627  | 2.598  |
| O2               | 2.652  | 2.636  | 2.631  | 2.644  |
| O14              | 2.701  | 2.695  | 2.693  | 2.672  |
| O16              | 2.859  | 2.851  | 2.86   | 2.893  |
| O4               | 2.432  | 2.412  | 2.401  | 2.388  |
| $d_{\text{ave}}$ | 2.701  | 2.689  | 2.687  | 2.686  |
| D                | 0.0388 | 0.0408 | 0.0428 | 0.0468 |

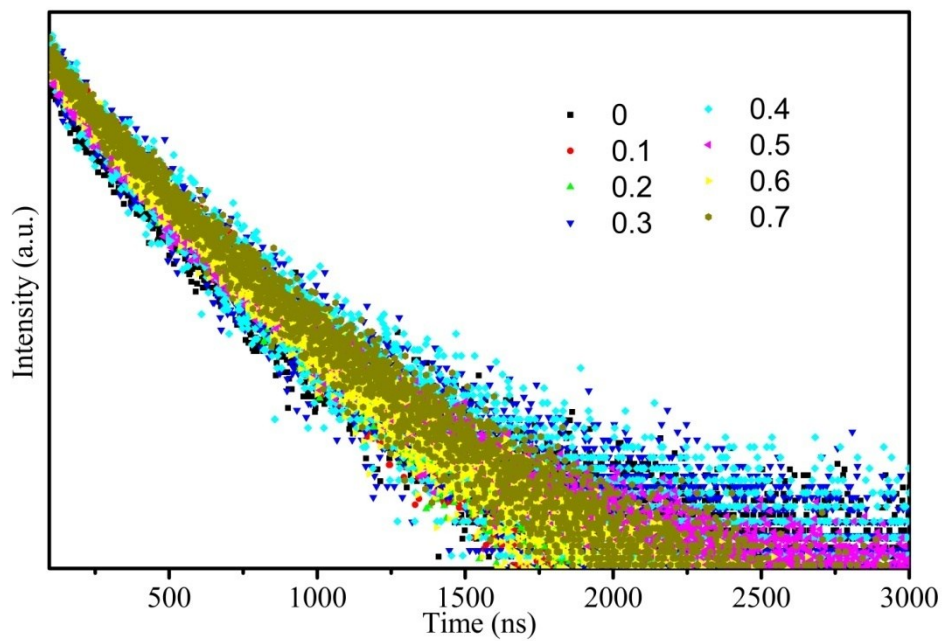

Fig.S2 Decay curves of  $\text{Sr}_{0.77-x}\text{Na}_x\text{Ca}_{0.2}\text{Al}_{2-x}\text{Si}_{2+x}\text{O}_8:0.03\text{Eu}^{2+}$  ( $x=0, 0.1, 0.2, 0.3, 0.4, 0.5, 0.6$  and  $0.7$ ) samples at room temperature.

Table S4 The life times of  $\text{Eu}^{2+}$  ions for  $\text{Sr}_{0.77-x}\text{Na}_x\text{Ca}_{0.2}\text{Al}_{2-x}\text{Si}_{2+x}\text{O}_8:0.03\text{Eu}^{2+}$ .

| value | Lifetime (ns) |
|-------|---------------|
| x=0   | 480.551       |
| x=0.1 | 493.51        |
| x=0.2 | 504.88        |
| x=0.3 | 507.793       |
| x=0.4 | 509.957       |
| x=0.5 | 510.266       |
| x=0.6 | 520.594       |
| x=0.7 | 537.20        |

Table S5 The life times of  $\text{Eu}^{2+}$  ions for  $\text{Sr}_{0.97-y}\text{Ca}_y\text{Al}_2\text{Si}_2\text{O}_8:0.03\text{Eu}^{2+}$ .

| value  | Lifetime (ns) |
|--------|---------------|
| y=0    | 510.78        |
| y=0.1  | 523.277       |
| y=0.2  | 539.450       |
| y=0.3  | 543.106       |
| y=0.4  | 559.837       |
| y=0.5  | 561.632       |
| y=0.6  | 585.054       |
| y=0.7  | 589.672       |
| y=0.8  | 604.060       |
| y=0.97 | 612.770       |



Table S6 The CIE chromaticity coordinates, internal quantum efficiency (IQE) and color purity (CP) of representative samples for two series.

| $\text{Sr}_{0.77-x}\text{Na}_x\text{Ca}_{0.2}\text{Al}_{2-x}\text{Si}_{2+x}\text{O}_8:0.03\text{Eu}^{2+}$ |                  |         |       | $\text{Sr}_{0.97-y}\text{Ca}_y\text{Al}_2\text{Si}_2\text{O}_8:0.03\text{Eu}^{2+}$ |                  |         |       |
|-----------------------------------------------------------------------------------------------------------|------------------|---------|-------|------------------------------------------------------------------------------------|------------------|---------|-------|
| value                                                                                                     | CIE (X,Y)        | IQE (%) | CP(%) | value                                                                              | CIE (X,Y)        | IQE (%) | CP(%) |
| x=0                                                                                                       | (0.1653, 0.1057) | 77.02   | 83.5  | y=0                                                                                | (0.1597, 0.0998) | 75.85   | 81.8  |
| x=0.2                                                                                                     | (0.1605,0.0918)  | 79.35   | 82.9  | y=0.3                                                                              | (0.1600, 0.0934) | 80.05   | 80.2  |
| x=0.4                                                                                                     | (0.1635, 0.0991) | 80.68   | 80.3  | y=0.5                                                                              | (0.1618, 0.1047) | 83.77   | 77.6  |
| x=0.7                                                                                                     | (0.1631, 0.1111) | 84.02   | 79.6  | y=0.8                                                                              | (0.1627, 0.1175) | 85.56   | 75.4  |
|                                                                                                           |                  |         |       | y=0.97                                                                             | (0.1637, 0.1628) | 89.04   | 72.1  |
